# Supplementary figures and images for: Thionine–graphene oxide covalent hybrid and its interaction with light
Source: Royal Society of Chemistry journal article supplement (doi:10.1039/c7cp01267e), 2017-01-01

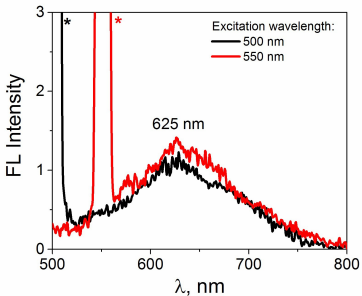

Supplement: c7cp01267e3.pdf [file c7cp01267e3.pdf]

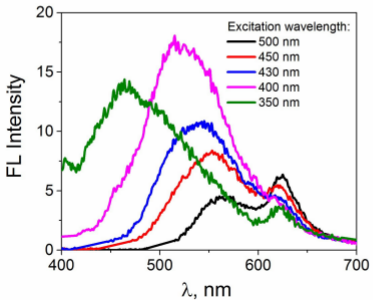

Supplement: c7cp01267e4.pdf [file c7cp01267e4.pdf]

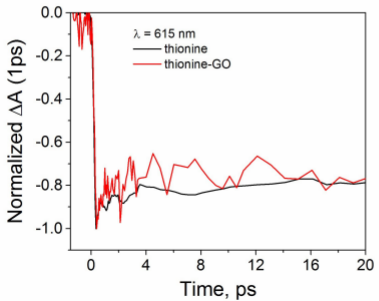

Supplement: c7cp01267e5.pdf [file c7cp01267e5.pdf]

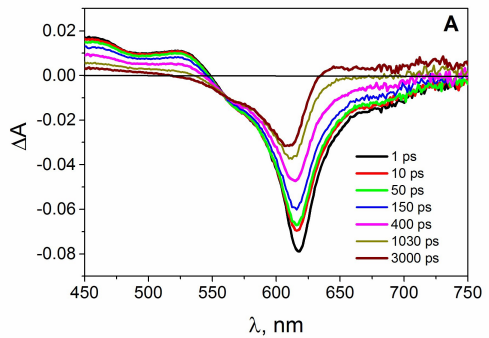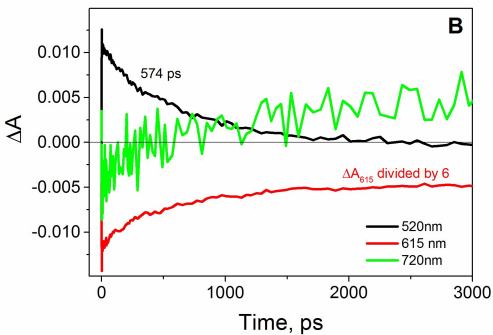

Supplement: c7cp01267e6.pdf [file c7cp01267e6.pdf]
